# Supplementary material
Source: publisher figshare collection journal article supplement (https://frontiersin.figshare.com/ndownloader/files/18721379)

**Supplementary Figure 1. Correlation of cytokine detection and the development of disease in children with pneumonia supplemented with zinc or placebo.** At the moment of infection Th1 cytokines increase and promote lymphoproliferation (PBMC-peripheral blood mononuclear cells) and inflammation; during the acute phase of pneumonia IFN $\gamma$  and IL-2 decrease, and at resolution an increase is observed with zinc supplementation in contrast to the placebo. TNF $\alpha$  remains high during pneumonia and at resolution in both groups, and IL-10 a downregulatory cytokine increases at resolution in both groups.

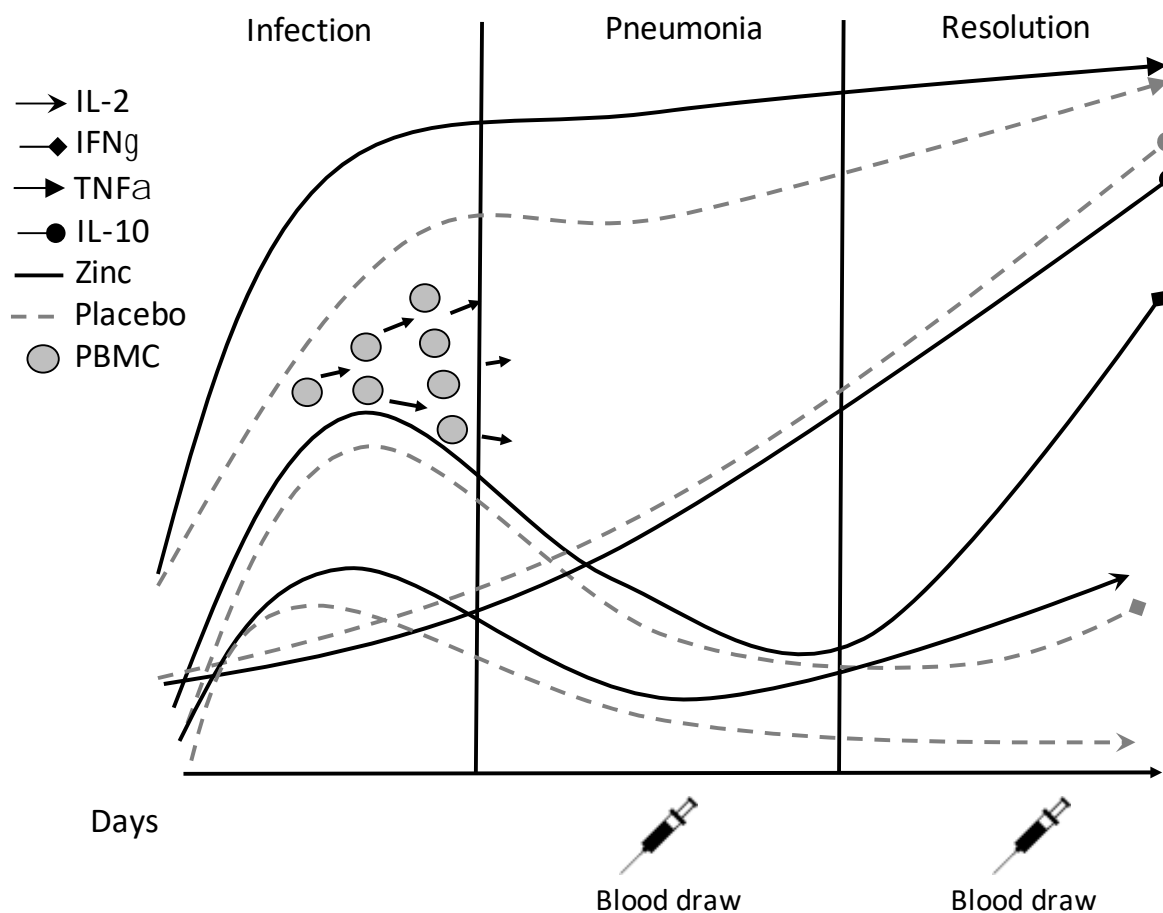

Supplement: Supplementary file [file 18721379]
